# Supplementary material
Source: HighWire-hosted journal article supplement (https://www.cmajopen.ca/highwire/filestream/88926/field_highwire_adjunct_files/1/open-2022-0118-2-at.pdf)
Supplement: open-2022-0118-2-at.pdf [file open-2022-0118-2-at.pdf]

**Appendix 2**–Description of inflammatory bowel disease (IBD) case definitions used in the study

| <b>Authors</b>                         | <b>Validation place</b> | <b>Case definition</b>                                                                                                                                                                                                                                                                                                                                                                                                | <b>Use</b>                              |
|----------------------------------------|-------------------------|-----------------------------------------------------------------------------------------------------------------------------------------------------------------------------------------------------------------------------------------------------------------------------------------------------------------------------------------------------------------------------------------------------------------------|-----------------------------------------|
| Bernstein and colleagues <sup>17</sup> | Manitoba, Canada        | <p><u>Within 2 years of health care coverage:</u><br/>                     - Had five or more separate health care contacts with the diagnosis of IBD</p> <p><u>In less than 2 years:</u><br/>                     - Had three or more health care contacts with the diagnosis of IBD</p> <p><u>Binary classification scores:</u><br/>                     - Sensitivity, 74.4–89.2%; and specificity, 89.8–93.7%</p> | Main analysis                           |
| Rezaie and colleagues <sup>29</sup>    | Alberta, Canada         | <p><u>Within a two-year period:</u><br/>                     - Individuals who experienced at least two hospitalizations or had four physician claims with a diagnosis of IBD</p> <p><u>Binary classification scores:</u><br/>                     - Specificity, 99.8%; sensitivity, 83.4%</p>                                                                                                                       | Sensitivity analysis, matched cohort #2 |
| Benchimol and colleagues <sup>22</sup> | Ontario, Canada         | <p><u>Within 4 years:</u><br/>                     - At least five physician contacts or two hospitalizations with the diagnosis of IBD</p> <p><u>Binary classification scores:</u><br/>                     - Sensitivity, 76.8%; specificity, 96.2%</p>                                                                                                                                                             | Sensitivity analysis, matched cohort #3 |

Appendix 2, as supplied by the authors. Appendix to: Marques Santos JD, Fowler S, Jennings D, et al. Health care utilization differences between First Nations people and the general population with inflammatory bowel disease: a retrospective cohort study from Saskatchewan, Canada. CMAJ Open 2022. doi:10.9778/cmajo.20220118. Copyright © 2022 The Author(s) or their employer(s). To receive this resource in an accessible format, please contact us at [cmajgroup@cmaj.ca](mailto:cmajgroup@cmaj.ca).
